# Supplementary material for: Water-soluble platinum and palladium nanoparticles modified with thiolated β-cyclodextrin
Source: Royal Society of Chemistry journal article supplement (doi:10.1039/b002423f), 2000-01-01

**Fig. S2** Size distribution histograms for platinum (top) and palladium (bottom) nanoparticles prepared by NaBH4 reduction in DMSO:H2O (1:4 v/v) of their metal complexes (MCl42-) in the presence of HS-β-CD.


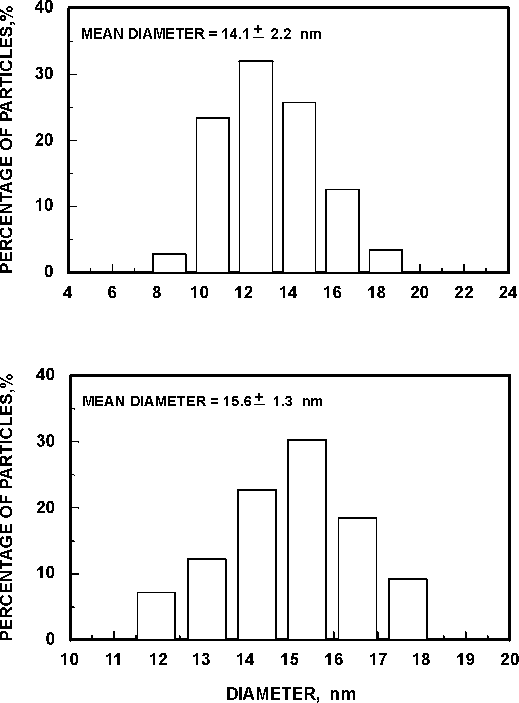

Supplement: b002423fs2.doc [file b002423fs2.doc]
